# Supplementary material for: Antioxidant Capacity of Carotenoid Extracts from the Haloarchaeon Halorhabdus utahensis
Source: MDPI journal article supplement (doi:10.3390/antiox12101840), 2023-10-10
Supplement: s1 [file s1]

# Antioxidant Capacity of Carotenoid Extracts from the Haloarchaeon *Halorhabdus utahensis*

Ismene Serino <sup>1,2,†</sup>, Giuseppe Squillaci <sup>2,†</sup>, Sara Errichiello <sup>2</sup>, Virginia Carbone <sup>3</sup>, Lidia Baraldi <sup>4</sup>, Francesco La Cara <sup>2</sup> and Alessandra Morana <sup>2,\*</sup>

<sup>1</sup> Department of Experimental Medicine, University of Campania “Luigi Vanvitelli”, Via Costantinopoli 16, 80138 Naples, Italy; ismene.serino@unicampania.it

<sup>2</sup> Research Institute on Terrestrial Ecosystems, National Research Council of Italy (CNR), Via Pietro Castellino 111, 80131 Naples, Italy; giuseppe.squillaci@iret.cnr.it (G.S.); errichiello.sara.se@icloud.com (S.E.); francesco.lacara@cnr.it (F.L.C.)

<sup>3</sup> Institute of Food Sciences, National Research Council of Italy (CNR), Via Roma 64, 83100 Avellino, Italy; virginia.carbone@cnr.it (V.C.)

<sup>4</sup> Institute of Experimental Endocrinology and Oncology “Gaetano Salvatore”, National Research Council of Italy (CNR), Via S. Pansini 5, 80131 Naples, Italy; lidia.baraldi@cnr.it

\* Correspondence: alessandra.morana@cnr.it

† These authors contributed equally to this work.

**Table S1.** Antioxidant activity of ascorbic acid, Trolox and BHT measured by FRAP assay, and related calibration curves.

| Ascorbic acid<br>( $\mu\text{g}$ ) | $A_{593\text{nm}}$ |
|------------------------------------|--------------------|
| 0.25                               | $0.042 \pm 0.004$  |
| 0.5                                | $0.074 \pm 0.003$  |
| 1.0                                | $0.150 \pm 0.006$  |
| 2.0                                | $0.316 \pm 0.005$  |
| 5.0                                | $0.787 \pm 0.008$  |

Calibration curve:  $A_{593\text{nm}} = 0.1572 \mu\text{g}$   $r^2 = 0.9998$

| BHT<br>( $\mu\text{g}$ ) | $A_{593\text{nm}}$ |
|--------------------------|--------------------|
| 5.00                     | $0.017 \pm 0.002$  |
| 50.0                     | $0.116 \pm 0.021$  |
| 100.0                    | $0.240 \pm 0.020$  |
| 200.0                    | $0.535 \pm 0.052$  |

Calibration curve:  $A_{593\text{nm}} = 0.0026 \mu\text{g}$   $r^2 = 0.9945$

| Trolox<br>( $\mu\text{g}$ )                                               | $A_{593\text{nm}}$ |
|---------------------------------------------------------------------------|--------------------|
| 1.0                                                                       | $0.066 \pm 0.006$  |
| 2.5                                                                       | $0.224 \pm 0.010$  |
| 5.0                                                                       | $0.49 \pm 0.028$   |
| 7.0                                                                       | $0.715 \pm 0.054$  |
| Calibration curve: $A_{593\text{nm}} = 0.0994 \mu\text{g}$ $r^2 = 0.9914$ |                    |
